# Supplementary material for: Adaptation of the Thought Suppression Inventory for use in a Greek population
Source: Research Square preprint supplement (doi:10.21203/rs.3.rs-5906886/v1), 2025-01-29
Supplement: Supplementary file 1 [file d5b076d20a408e830888ef63.docx]

Appendix

Thought Suppression Inventory (TSI, Rassin, 2003) Standardised for the Greek Language)

Ερωτηματολόγιο για την απώθηση Ανεπιθύνητων Σκέψεων

1. Έχω πολλές δυσάρεστες σκέψεις
2. Πάντα προσπαθώ να ξεχνάω τα δυσάρεστα γεγονότα όσον το δυνατόν γρηγορότερα
3. Είμαι ικανός/ή να βγάλω ένα πρόβλημα από το μυαλό μου ώσπου να έχω χρόνο να ασχοληθώ με αυτό
4. Νιώθω πολλά έντονα συναισήματα που δεν μπορώ να τα ελέγξω
5. Πάντα προσπαθώ να μην σκέφτομαι τα προβληματά μου
6. Είμαι ικανός/ή να αποβάλλω από το μυαλό μου δυσάρεστες σκέψεις
7. Έχω σκέψεις τις οποίες θα προτιμούσα να μην έχω
8. Όταν έχω μια δυσάρεστη σκέψη προσπαθώ να σκεφτώ κάτι άλλο.
9. Είμαι ικανός/ή να αφήσω στην άκρη προβλήματα και ανησυχίες
10. Συχνά ακούω ανεξήγητα πράγματα μέσα στο κεφάλι μου όπως την φωνή μου ή τις φωνές ανθρώπων που δεν είναι παρόντες.
11. Μερικές φορές παραμένω απασχολημένος μόνο και μόνο για να μην έχω συγκεκριμένες σκέψεις
12. Είμαι ικανός να ξεχνάω δυσάρεστες εμπειριες σε σημείο που μετα βιας τις θυμάμαι
13. Είμαι ικανός να συγκεντρώνομαι
14. Προσπαθώ να αποφέυγω συγκεκριμένες σκέψεις
15. Μπορώ να ελέγχω τα συναισθήματά μου σε στιγμές που αν δεν το κάνω αυτό θα μου δημιουργείσει πρόβλημα
